# Supplementary material
Source: PubMed Central journal article supplement (PMC7758910)
Supplement: NIHMS1068526-supplement-Supplemental_Tables.pdf [file NIHMS1068526-supplement-Supplemental_Tables.pdf]

**Title:** Pre- and Post- Diagnosis Smoking and Survival Following Diagnosis with Ovarian Cancer

**Short title:** Smoking and Ovarian Cancer Survival

Tianyi Wang, Mary K. Townsend, Vani Simmons, Kathryn L. Terry, Ursula A. Matulonis, Shelley Tworoger

**Table of contents:**

Supplementary Table 1. Selected characteristics of ovarian cancer patients by pre-diagnosis smoking status in the NHS and NHSII

Supplementary Table 2. Epithelial ovarian cancer-specific mortality and all-cause mortality by smoking across cohorts

Supplementary Table 3. Epithelial ovarian cancer-specific mortality and all-cause mortality according to changes in smoking from pre-diagnosis to post-diagnosis across cohorts

Supplementary Table 4. All-cause mortality stratified by tumor histologic subtype in the NHS and NHSII

Supplementary Table 5. Epithelial ovarian cancer-specific mortality and all-cause mortality stratified by BMI in the NHS and NHSII

Supplementary Table 6. Epithelial ovarian cancer-specific mortality and all-cause mortality stratified by post-diagnosis NSAID usage in the NHS and NHSII

**Supplementary Table 1. Selected characteristics of ovarian cancer patients by pre-diagnosis smoking status in the NHS and NHSII**

|                                                                           | Pre-diagnosis smoking   |                          |                           |
|---------------------------------------------------------------------------|-------------------------|--------------------------|---------------------------|
|                                                                           | Never smoker<br>(n=609) | Former smoker<br>(n=496) | Current smoker<br>(n=169) |
| Deaths from ovarian cancer, n (%)                                         | 339 (55.7)              | 316 (63.7)               | 104 (61.5)                |
| Deaths from all causes, n (%)                                             | 402 (66.0)              | 361 (72.8)               | 129 (76.3)                |
| Age at diagnosis, years, median (IQR)                                     | 61.0 (52.0,69.0)        | 65.0 (56.0,72.0)         | 56.0 (50.0,65.0)          |
| Calendar year of diagnosis, median (IQR)                                  | 2000 (1993,2007)        | 2001 (1993,2006)         | 1993 (1985,2001)          |
| Overall survival time since ovarian cancer diagnosis, years, median (IQR) | 4.9 (2.2,10.6)          | 3.8 (1.7,8.3)            | 4.0 (1.8,13.8)            |
| Tumor histologic subtype, n (%)                                           |                         |                          |                           |
| High grade serous or poorly differentiated                                | 384 (63.1)              | 339 (68.4)               | 109 (64.5)                |
| Mucinous                                                                  | 22 (3.6)                | 16 (3.2)                 | 11 (6.5)                  |
| Endometrioid                                                              | 93 (15.3)               | 57 (11.5)                | 23 (13.6)                 |
| Clear cell                                                                | 48 (7.9)                | 30 (6.1)                 | 7 (4.1)                   |
| Other or unknown                                                          | 62 (10.2)               | 54 (10.9)                | 19 (11.2)                 |
| Stage, n (%)                                                              |                         |                          |                           |
| I                                                                         | 151 (24.8)              | 103 (20.8)               | 48 (28.4)                 |
| II                                                                        | 60 (9.9)                | 39 (7.9)                 | 16 (9.5)                  |
| III                                                                       | 398 (65.4)              | 354 (71.4)               | 105 (62.1)                |
| Pre-diagnosis BMI, kg/m <sup>2</sup> , n (%)                              |                         |                          |                           |
| <21                                                                       | 74 (12.2)               | 60 (12.1)                | 34 (20.1)                 |
| 21-<23                                                                    | 98 (16.1)               | 72 (14.5)                | 30 (17.8)                 |
| 23-<25                                                                    | 111 (18.2)              | 90 (18.2)                | 32 (18.9)                 |
| 25-<30                                                                    | 162 (26.6)              | 147 (29.6)               | 37 (21.9)                 |
| 30-<35                                                                    | 81 (13.3)               | 62 (12.5)                | 18 (10.7)                 |
| ≥35                                                                       | 57 (9.4)                | 42 (8.5)                 | 7 (4.1)                   |
| Missing                                                                   | 26 (4.3)                | 23 (4.6)                 | 11 (6.5)                  |
| Pre-diagnosis NSAID use, n (%)                                            |                         |                          |                           |
| Never user                                                                | 83 (13.6)               | 46 (9.3)                 | 22 (13.0)                 |
| Past user                                                                 | 135 (22.2)              | 107 (21.6)               | 29 (17.2)                 |
| Current user to either aspirin or non-aspirin NSAIDs                      | 264 (43.4)              | 250 (50.4)               | 75 (44.4)                 |
| Current user to both aspirin and non-aspirin NSAIDs                       | 72 (11.8)               | 58 (11.7)                | 14 (8.3)                  |
| Missing                                                                   | 55 (9.0)                | 35 (7.1)                 | 29 (17.2)                 |

Abbreviations: BMI, body mass index; IQR, interquartile range; NHS, Nurses' Health Study; NHSII, Nurses' Health Study II; NSAID, non-steroidal anti-inflammatory drug. Percentages may not add up to 100%.

**Supplementary Table 2. Epithelial ovarian cancer-specific mortality and all-cause mortality by smoking across cohorts**

|                                                         | Epithelial ovarian cancer-specific mortality |                     |                     | All-cause mortality     |                     |                     |
|---------------------------------------------------------|----------------------------------------------|---------------------|---------------------|-------------------------|---------------------|---------------------|
|                                                         | NHS<br>HR (95%CI)                            | NHSII<br>HR (95%CI) | p-<br>heterogeneity | NHS<br>HR (95%CI)       | NHSII<br>HR (95%CI) | p-<br>heterogeneity |
| <b>Pre-diagnosis smoking</b>                            |                                              |                     |                     |                         |                     |                     |
| n, deaths/cases                                         | 661/993                                      | 98/281              | -                   | 787/993                 | 105/281             | -                   |
| Never                                                   | 1.00 (ref)                                   | 1.00 (ref)          | -                   | 1.00 (ref)              | 1.00 (ref)          | -                   |
| Past                                                    | <b>1.22 (1.03,1.44)</b>                      | 0.96 (0.60,1.55)    | 0.36                | <b>1.22 (1.05,1.42)</b> | 0.97 (0.61,1.54)    | 0.35                |
| Current                                                 | <b>1.28 (1.01,1.63)</b>                      | 0.97 (0.50,1.89)    | 0.45                | <b>1.39 (1.12,1.72)</b> | 0.91 (0.47,1.77)    | 0.24                |
| <b>Pre-diagnosis smoking dose</b>                       |                                              |                     |                     |                         |                     |                     |
| n, deaths/cases                                         | 650/977                                      | 97/280              | -                   | 773/977                 | 104/280             | -                   |
| Never                                                   | 1.00 (ref)                                   | 1.00 (ref)          | -                   | 1.00 (ref)              | 1.00 (ref)          | -                   |
| Former smoker, <15 cigs/day                             | 1.07 (0.87,1.31)                             | 1.21 (0.70,2.10)    | 0.67                | 1.11 (0.92,1.34)        | 1.22 (0.71,2.08)    | 0.74                |
| Former smoker, ≥15 cigs/day                             | <b>1.39 (1.14,1.71)</b>                      | 0.63 (0.29,1.37)    | 0.05                | <b>1.34 (1.10,1.62)</b> | 0.66 (0.32,1.37)    | 0.07                |
| Current smoker, <15 cigs/day                            | 1.10 (0.76,1.58)                             | 0.73 (0.31,1.73)    | 0.39                | 1.00 (0.71,1.43)        | 0.68 (0.29,1.62)    | 0.42                |
| Current smoker, ≥15 cigs/day                            | 1.35 (1.00,1.82)                             | 1.64 (0.60,4.53)    | 0.71                | <b>1.62 (1.25,2.11)</b> | 1.53 (0.56,4.16)    | 0.91                |
| <b>Pre-diagnosis smoking duration, years</b>            |                                              |                     |                     |                         |                     |                     |
| n, deaths/cases                                         | 656/985                                      | 97/280              | -                   | 780/985                 | 104/280             | -                   |
| Never                                                   | 1.00 (ref)                                   | 1.00 (ref)          | -                   | 1.00 (ref)              | 1.00 (ref)          | -                   |
| <20 years                                               | 1.17 (0.95,1.44)                             | 0.88 (0.51,1.50)    | 0.32                | 1.15 (0.95,1.40)        | 0.92 (0.55,1.53)    | 0.41                |
| ≥20 years                                               | <b>1.26 (1.06,1.50)</b>                      | 1.09 (0.63,1.90)    | 0.62                | <b>1.32 (1.12,1.54)</b> | 1.01 (0.58,1.75)    | 0.37                |
| <b>Pre-diagnosis smoking pack-year</b>                  |                                              |                     |                     |                         |                     |                     |
| n, deaths/cases                                         | 651/979                                      | 97/280              | -                   | 775/979                 | 104/280             | -                   |
| Never                                                   | 1.00 (ref)                                   | 1.00 (ref)          | -                   | 1.00 (ref)              | 1.00 (ref)          | -                   |
| <20 pack-years                                          | 1.13 (0.94,1.37)                             | 1.02 (0.65,1.61)    | 0.68                | 1.13 (0.95,1.35)        | 1.03 (0.66,1.60)    | 0.69                |
| ≥20 pack-years                                          | <b>1.32 (1.10,1.59)</b>                      | 0.83 (0.40,1.72)    | 0.22                | <b>1.38 (1.16,1.63)</b> | 0.77 (0.37,1.59)    | 0.13                |
| <b>Pre-diagnosis time since quitting smoking, years</b> |                                              |                     |                     |                         |                     |                     |
| n, deaths/cases                                         | 564/849                                      | 86/249              | -                   | 664/849                 | 93/249              | -                   |
| Never                                                   | 1.00 (ref)                                   | 1.00 (ref)          | -                   | 1.00 (ref)              | 1.00 (ref)          | -                   |
| <15 years                                               | 1.24 (0.97,1.59)                             | 0.77 (0.37,1.59)    | 0.22                | 1.29 (1.03,1.62)        | 0.71 (0.34,1.46)    | 0.12                |

|                                    |                         |                          |      |                         |                          |      |
|------------------------------------|-------------------------|--------------------------|------|-------------------------|--------------------------|------|
| 15-<22 years                       | 1.21 (0.90,1.62)        | 0.89 (0.41,1.93)         | 0.47 | 1.24 (0.95,1.62)        | 0.84 (0.39,1.80)         | 0.34 |
| ≥22 years                          | 1.18 (0.96,1.45)        | 1.30 (0.59,2.87)         | 0.81 | 1.14 (0.94,1.38)        | 1.59 (0.77,3.27)         | 0.39 |
| <b>Post-diagnosis smoking</b>      |                         |                          |      |                         |                          |      |
| n, deaths/cases                    | 525/858                 | 92/275                   | -    | 648/858                 | 99/275                   | -    |
| Never                              | 1.00 (ref)              | 1.00 (ref)               | -    | 1.00 (ref)              | 1.00 (ref)               | -    |
| Past                               | <b>1.32 (1.10,1.59)</b> | 1.10 (0.67,1.81)         | 0.50 | <b>1.29 (1.09,1.53)</b> | 1.04 (0.65,1.69)         | 0.41 |
| Current                            | <b>1.53 (1.12,2.08)</b> | 1.38 (0.65,2.92)         | 0.80 | <b>1.53 (1.16,2.01)</b> | 1.30 (0.62,2.74)         | 0.69 |
| <b>Post-diagnosis smoking dose</b> |                         |                          |      |                         |                          |      |
| n, deaths/cases                    | 518/844                 | 90/273                   | -    | 637/844                 | 97/273                   | -    |
| Never                              | 1.00 (ref)              | 1.00 (ref)               | -    | 1.00 (ref)              | 1.00 (ref)               | -    |
| Former smoker, <15 cigs/day        | <b>1.26 (1.00,1.57)</b> | 1.36 (0.76,2.42)         | 0.80 | <b>1.24 (1.01,1.52)</b> | 1.28 (0.73,2.24)         | 0.92 |
| Former smoker, ≥15 cigs/day        | <b>1.38 (1.10,1.73)</b> | 0.73 (0.34,1.56)         | 0.12 | <b>1.33 (1.08,1.63)</b> | 0.71 (0.34,1.47)         | 0.11 |
| Current smoker, <15 cigs/day       | 1.15 (0.70,1.87)        | 0.98 (0.38,2.54)         | 0.77 | 1.08 (0.69,1.68)        | 0.92 (0.36,2.37)         | 0.76 |
| Current smoker, ≥15 cigs/day       | <b>2.37 (1.61,3.48)</b> | <b>3.61 (1.06,12.28)</b> | 0.52 | <b>2.43 (1.73,3.40)</b> | <b>3.48 (1.03,11.80)</b> | 0.58 |

Abbreviations: CI, confidence interval; HR, hazard ratio; NHS, Nurses' Health Study; NHSII, Nurses' Health Study II.

Models adjusted for age and calendar year at diagnosis, tumor histologic subtype, stage, and body mass index (categorical).

Post-diagnosis models additionally adjusted for non-steroidal anti-inflammatory drug usage.

**Supplementary Table 3. Epithelial ovarian cancer-specific mortality and all-cause mortality according to changes in smoking from pre-diagnosis to post-diagnosis across cohorts**

|                                               | Epithelial ovarian cancer-specific mortality |                     |                     | All-cause mortality     |                     |                     |
|-----------------------------------------------|----------------------------------------------|---------------------|---------------------|-------------------------|---------------------|---------------------|
|                                               | NHS<br>HR (95%CI)                            | NHSII<br>HR (95%CI) | p-<br>heterogeneity | NHS<br>HR (95%CI)       | NHSII<br>HR (95%CI) | p-<br>heterogeneity |
| Change in smoking from pre- to post-diagnosis |                                              |                     |                     |                         |                     |                     |
| n, deaths/cases                               | 520/839                                      | 92/275              |                     | 638/839                 | 99/275              | -                   |
| Never smoker                                  | 1.00 (ref)                                   | 1.00 (ref)          | -                   | 1.00 (ref)              | 1.00 (ref)          | -                   |
| Past smoker                                   | <b>1.23 (1.02,1.49)</b>                      | 0.90 (0.54,1.50)    | 0.26                | <b>1.22 (1.03,1.45)</b> | 0.91 (0.56,1.48)    | 0.26                |
| Quitting smoking after diagnosis              | 0.93 (0.59,1.47)                             | 0.35 (0.05,2.66)    | 0.36                | 1.00 (0.67,1.49)        | 0.33 (0.04,2.47)    | 0.29                |
| Remained current smoker                       | <b>1.47 (1.07,2.01)</b>                      | 1.09 (0.52,2.31)    | 0.48                | <b>1.51 (1.14,2.00)</b> | 1.08 (0.51,2.27)    | 0.40                |

Abbreviations: CI, confidence interval; HR, hazard ratio; NHS, Nurses' Health Study; NHSII, Nurses' Health Study II.

Never smoker is defined as being a never smoker at both pre- and post-diagnosis assessments; Former smoker is defined as being a former smoker at both assessments; Quit smoking after diagnosis is defined as being a current smoker before diagnosis and former smoker after diagnosis; Remained current smoker is defined as being a current smoker at both assessments.

Models adjusted for age and calendar year at diagnosis, tumor histologic subtype, stage, pre-diagnosis body mass index (BMI, categorical), change of BMI (categorical) and non-steroidal anti-inflammatory drug usage from pre- to post-diagnosis, and cohort. Due to the small sample size, participants who reported past smoking before diagnosis and current smoking after diagnosis were excluded (n=2).

**Supplementary Table 4. All-cause mortality stratified by tumor histologic subtype in the NHS and NHSII**

|                                                                    | All-cause mortality                                  |                         |                                          |                         | p-heterogeneity |
|--------------------------------------------------------------------|------------------------------------------------------|-------------------------|------------------------------------------|-------------------------|-----------------|
|                                                                    | High-grade serous or poorly differentiated histology |                         | Non-serous or low-grade serous histology |                         |                 |
|                                                                    | n, deaths/cases                                      | HR (95%CI)              | n, deaths/cases                          | HR (95%CI)              |                 |
| <b>Pre-diagnosis smoking</b>                                       |                                                      |                         |                                          |                         |                 |
| Never smoker                                                       | 291/384                                              | 1.00 (ref)              | 106/211                                  | 1.00 (ref)              | 0.14            |
| Former smoker                                                      | 276/339                                              | <b>1.25 (1.06,1.48)</b> | 82/147                                   | 0.98 (0.72,1.31)        |                 |
| Current smoker                                                     | 89/109                                               | 1.20 (0.94,1.53)        | 35/54                                    | 1.39 (0.93,2.10)        |                 |
| <b>Pre-diagnosis smoking rate</b>                                  |                                                      |                         |                                          |                         |                 |
| Never smoker                                                       | 291/384                                              | 1.00 (ref)              | 106/211                                  | 1.00 (ref)              | <b>0.01</b>     |
| Former smoker, <15 cigs/day                                        | 135/171                                              | 1.13 (0.92,1.39)        | 48/82                                    | 1.15 (0.81,1.65)        |                 |
| Former smoker, ≥15 cigs/day                                        | 135/162                                              | <b>1.38 (1.12,1.70)</b> | 32/62                                    | 0.76 (0.51,1.15)        |                 |
| Current smoker, <15 cigs/day                                       | 31/46                                                | 0.89 (0.61,1.29)        | 7/16                                     | 1.01 (0.46,2.21)        |                 |
| Current smoker, ≥15 cigs/day                                       | 53/58                                                | <b>1.42 (1.04,1.92)</b> | 27/36                                    | <b>1.65 (1.04,2.61)</b> |                 |
| <b>Pre-diagnosis smoking duration</b>                              |                                                      |                         |                                          |                         |                 |
| Never smoker                                                       | 291/384                                              | 1.00 (ref)              | 106/211                                  | 1.00 (ref)              | <b>0.03</b>     |
| <20 years                                                          | 128/159                                              | <b>1.24 (1.00,1.53)</b> | 42/92                                    | 0.78 (0.54,1.14)        |                 |
| ≥20 years                                                          | 231/282                                              | <b>1.23 (1.03,1.47)</b> | 73/107                                   | 1.32 (0.96,1.79)        |                 |
| <b>Pre-diagnosis smoking pack-years</b>                            |                                                      |                         |                                          |                         |                 |
| Never smoker                                                       | 291/384                                              | 1.00 (ref)              | 106/211                                  | 1.00 (ref)              | 0.45            |
| <20 pack-years                                                     | 175/222                                              | 1.15 (0.95,1.39)        | 57/115                                   | 0.99 (0.71,1.39)        |                 |
| ≥20 pack-years                                                     | 180/215                                              | <b>1.32 (1.09,1.60)</b> | 58/83                                    | 1.15 (0.82,1.60)        |                 |
| <b>Pre-diagnosis time since quitting smoking</b>                   |                                                      |                         |                                          |                         |                 |
| Never smoker                                                       | 291/384                                              | 1.00 (ref)              | 106/211                                  | 1.00 (ref)              | 0.15            |
| <15 years                                                          | 79/96                                                | 1.24 (0.96,1.60)        | 33/53                                    | 1.09 (0.72,1.63)        |                 |
| 15-<22 years                                                       | 53/66                                                | 1.29 (0.96,1.74)        | 20/37                                    | 0.84 (0.51,1.38)        |                 |
| ≥22 years                                                          | 139/171                                              | <b>1.23 (1.00,1.52)</b> | 28/56                                    | 0.90 (0.58,1.40)        |                 |
| <b>Post-diagnosis smoking</b>                                      |                                                      |                         |                                          |                         |                 |
| Never smoker                                                       | 243/336                                              | 1.00 (ref)              | 92/197                                   | 1.00 (ref)              | 0.15            |
| Former smoker                                                      | 253/324                                              | <b>1.34 (1.12,1.61)</b> | 79/152                                   | 0.97 (0.71,1.33)        |                 |
| Current smoker                                                     | 56/69                                                | <b>1.55 (1.15,2.09)</b> | 20/34                                    | 1.13 (0.68,1.88)        |                 |
| <b>Post-diagnosis smoking rate</b>                                 |                                                      |                         |                                          |                         |                 |
| Never smoker                                                       | 243/336                                              | 1.00 (ref)              | 92/197                                   | 1.00 (ref)              | <b>0.01</b>     |
| Former smoker, <15 cigs/day                                        | 125/167                                              | <b>1.26 (1.01,1.58)</b> | 46/84                                    | 1.24 (0.85,1.80)        |                 |
| Former smoker, ≥15 cigs/day                                        | 120/149                                              | <b>1.38 (1.11,1.73)</b> | 31/65                                    | 0.75 (0.49,1.14)        |                 |
| Current smoker, <15 cigs/day                                       | 22/33                                                | 1.02 (0.65,1.58)        | 4/11                                     | 1.22 (0.44,3.44)        |                 |
| Current smoker, ≥15 cigs/day                                       | 32/33                                                | <b>2.74 (1.85,4.06)</b> | 15/21                                    | 1.50 (0.82,2.72)        |                 |
| <b>Change in smoking from pre- to post-diagnosis<sup>1,2</sup></b> |                                                      |                         |                                          |                         |                 |
| Never smoker                                                       | 236/326                                              | 1.00 (ref)              | 87/189                                   | 1.00 (ref)              | <b>0.047</b>    |
| Former smoker                                                      | 226/285                                              | <b>1.37 (1.13,1.65)</b> | 67/129                                   | 0.83 (0.59,1.17)        |                 |
| Quit smoking after diagnosis                                       | 21/29                                                | 0.86 (0.54,1.37)        | 7/13                                     | 0.77 (0.34,1.76)        |                 |
| Remained current smoker                                            | 53/64                                                | <b>1.50 (1.10,2.05)</b> | 18/30                                    | 1.47 (0.84,2.57)        |                 |

---

Abbreviations: CI, confidence interval; HR, hazard ratio; NHS, Nurses' Health Study; NHSII, Nurses' Health Study II. Non-serous histologic subtype refers to mucinous, endometrioid, clear cell, transitional/Brenner, carcinosarcoma, or mixed subtypes of ovarian cancer.

Never smoker is defined as being a never smoker at both pre- and post-diagnosis assessments; Former smoker is defined as being a former smoker at both assessments; Quit smoking after diagnosis is defined as being a current smoker before diagnosis and former smoker after diagnosis; Remained current smoker is defined as being a current smoker at both assessments.

Models adjusted for age and calendar year at diagnosis, stage, body mass index (BMI, categorical), and cohort.

Post-diagnosis models additionally adjusted for non-steroidal anti-inflammatory drug (NSAID) usage.

<sup>1</sup> Models adjusted for age and calendar year at diagnosis, stage, pre-diagnosis BMI (categorical), change of BMI (categorical) and NSAID usage from pre-diagnosis to post-diagnosis, and cohort.

<sup>2</sup> Due to the small sample size, participants who reported past smoking before diagnosis and current smoking after diagnosis were excluded (n=2).

**Supplementary Table 5. Epithelial ovarian cancer-specific mortality and all-cause mortality stratified by BMI in the NHS and NHSII**

|                                                  | Epithelial ovarian cancer-specific mortality        |                                                     |                     | All-cause mortality                                 |                                                     |                     |
|--------------------------------------------------|-----------------------------------------------------|-----------------------------------------------------|---------------------|-----------------------------------------------------|-----------------------------------------------------|---------------------|
|                                                  | BMI<25 kg/m <sup>2</sup><br>HR (95%CI) <sup>3</sup> | BMI≥25 kg/m <sup>2</sup><br>HR (95%CI) <sup>3</sup> | p-<br>heterogeneity | BMI<25 kg/m <sup>2</sup><br>HR (95%CI) <sup>3</sup> | BMI≥25 kg/m <sup>2</sup><br>HR (95%CI) <sup>3</sup> | p-<br>heterogeneity |
| <b>Pre-diagnosis smoking</b>                     |                                                     |                                                     |                     |                                                     |                                                     |                     |
| n, deaths/cases                                  | 385/615                                             | 347/625                                             | 0.07                | 450/615                                             | 412/625                                             | 0.07                |
| Never smoker                                     | 1.00 (ref)                                          | 1.00 (ref)                                          |                     | 1.00 (ref)                                          | 1.00 (ref)                                          |                     |
| Former smoker                                    | <b>1.27 (1.02,1.59)</b>                             | 1.08 (0.86,1.35)                                    |                     | <b>1.24 (1.01,1.52)</b>                             | 1.10 (0.90,1.36)                                    |                     |
| Current smoker                                   | <b>1.44 (1.07,1.94)</b>                             | 0.91 (0.62,1.32)                                    |                     | <b>1.50 (1.14,1.97)</b>                             | 1.02 (0.73,1.42)                                    |                     |
| <b>Pre-diagnosis smoking rate</b>                |                                                     |                                                     |                     |                                                     |                                                     |                     |
| n, deaths/cases                                  | 380/607                                             | 341/617                                             | <b>0.04</b>         | 444/607                                             | 404/617                                             | <b>0.02</b>         |
| Never smoker                                     | 1.00 (ref)                                          | 1.00 (ref)                                          |                     | 1.00 (ref)                                          | 1.00 (ref)                                          |                     |
| Former smoker, <15 cigs/day                      | 1.15 (0.88,1.51)                                    | 0.99 (0.75,1.31)                                    |                     | 1.12 (0.87,1.45)                                    | 1.07 (0.83,1.38)                                    |                     |
| Former smoker, ≥15 cigs/day                      | <b>1.45 (1.10,1.91)</b>                             | 1.16 (0.88,1.53)                                    |                     | <b>1.40 (1.08,1.82)</b>                             | 1.11 (0.85,1.44)                                    |                     |
| Current smoker, <15 cigs/day                     | 1.16 (0.73,1.84)                                    | 0.89 (0.53,1.50)                                    |                     | 0.96 (0.61,1.52)                                    | 0.86 (0.52,1.42)                                    |                     |
| Current smoker, ≥15 cigs/day                     | <b>1.62 (1.13,2.33)</b>                             | 0.84 (0.50,1.39)                                    |                     | <b>1.93 (1.40,2.67)</b>                             | 1.05 (0.69,1.62)                                    |                     |
| <b>Pre-diagnosis smoking duration</b>            |                                                     |                                                     |                     |                                                     |                                                     |                     |
| n, deaths/cases                                  | 383/612                                             | 343/619                                             | 0.11                | 447/612                                             | 407/619                                             | 0.10                |
| Never smoker                                     | 1.00 (ref)                                          | 1.00 (ref)                                          |                     | 1.00 (ref)                                          | 1.00 (ref)                                          |                     |
| <20 years                                        | 1.21 (0.92,1.59)                                    | 1.05 (0.80,1.40)                                    |                     | 1.14 (0.88,1.48)                                    | 1.08 (0.84,1.40)                                    |                     |
| ≥20 years                                        | <b>1.38 (1.10,1.73)</b>                             | 1.03 (0.81,1.32)                                    |                     | <b>1.40 (1.13,1.72)</b>                             | 1.08 (0.86,1.35)                                    |                     |
| <b>Pre-diagnosis smoking pack-years</b>          |                                                     |                                                     |                     |                                                     |                                                     |                     |
| n, deaths/cases                                  | 382/610                                             | 340/616                                             | <b>0.01</b>         | 446/610                                             | 404/616                                             | <b>0.01</b>         |
| Never smoker                                     | 1.00 (ref)                                          | 1.00 (ref)                                          |                     | 1.00 (ref)                                          | 1.00 (ref)                                          |                     |
| <20 pack-years                                   | 1.15 (0.90,1.47)                                    | 1.10 (0.85,1.41)                                    |                     | 1.10 (0.87,1.38)                                    | 1.12 (0.89,1.42)                                    |                     |
| ≥20 pack-years                                   | <b>1.54 (1.21,1.97)</b>                             | 0.97 (0.74,1.26)                                    |                     | <b>1.58 (1.26,1.97)</b>                             | 1.02 (0.80,1.31)                                    |                     |
| <b>Pre-diagnosis time since quitting smoking</b> |                                                     |                                                     |                     |                                                     |                                                     |                     |
| n, deaths/cases                                  | 319/514                                             | 308/556                                             | 0.23                | 369/514                                             | 363/556                                             | 0.38                |
| Never smoker                                     | 1.00 (ref)                                          | 1.00 (ref)                                          |                     | 1.00 (ref)                                          | 1.00 (ref)                                          |                     |
| <15 years                                        | 1.18 (0.84,1.64)                                    | 1.08 (0.78,1.50)                                    |                     | 1.24 (0.91,1.68)                                    | 1.10 (0.81,1.49)                                    |                     |
| 15-<22 years                                     | 1.35 (0.90,2.02)                                    | 1.14 (0.77,1.67)                                    |                     | 1.33 (0.92,1.93)                                    | 1.17 (0.82,1.66)                                    |                     |



|                                                                             |                         |                         |      |                         |                         |      |
|-----------------------------------------------------------------------------|-------------------------|-------------------------|------|-------------------------|-------------------------|------|
| ≥22 years                                                                   | 1.30 (0.99,1.72)        | 1.03 (0.77,1.38)        |      | 1.20 (0.92,1.56)        | 1.07 (0.82,1.39)        |      |
| <b>Post-diagnosis smoking</b>                                               |                         |                         |      |                         |                         |      |
| n, deaths/cases                                                             | 329/590                 | 255/509                 | 0.84 | 397/590                 | 317/509                 | 0.41 |
| Never smoker                                                                | 1.00 (ref)              | 1.00 (ref)              |      | 1.00 (ref)              | 1.00 (ref)              |      |
| Former smoker                                                               | 1.20 (0.95,1.53)        | 1.16 (0.89,1.50)        |      | 1.18 (0.95,1.46)        | 1.20 (0.95,1.51)        |      |
| Current smoker                                                              | <b>1.46 (1.01,2.10)</b> | 1.30 (0.77,2.21)        |      | <b>1.53 (1.10,2.13)</b> | 1.16 (0.72,1.87)        |      |
| <b>Post-diagnosis smoking rate</b>                                          |                         |                         |      |                         |                         |      |
| n, deaths/cases                                                             | 324/583                 | 252/501                 | 0.42 | 390/583                 | 312/501                 | 0.56 |
| Never smoker                                                                | 1.00 (ref)              | 1.00 (ref)              |      | 1.00 (ref)              | 1.00 (ref)              |      |
| Former smoker, <15 cigs/day                                                 | 1.16 (0.88,1.54)        | 1.10 (0.80,1.52)        |      | 1.12 (0.86,1.45)        | 1.19 (0.90,1.59)        |      |
| Former smoker, ≥15 cigs/day                                                 | 1.24 (0.92,1.69)        | 1.19 (0.87,1.64)        |      | 1.24 (0.94,1.64)        | 1.17 (0.87,1.56)        |      |
| Current smoker, <15 cigs/day                                                | 0.99 (0.55,1.78)        | 1.01 (0.52,1.96)        |      | 0.96 (0.57,1.64)        | 0.92 (0.49,1.72)        |      |
| Current smoker, ≥15 cigs/day                                                | <b>2.31 (1.48,3.59)</b> | <b>2.67 (1.20,5.93)</b> |      | <b>2.47 (1.66,3.67)</b> | <b>2.13 (1.08,4.19)</b> |      |
| <b>Change in smoking from pre-diagnosis to post-diagnosis<sup>1,2</sup></b> |                         |                         |      |                         |                         |      |
| n, deaths/cases                                                             | 310/532                 | 285/558                 | 0.06 | 369/532                 | 348/558                 | 0.13 |
| Never smoker                                                                | 1.00 (ref)              | 1.00 (ref)              |      | 1.00 (ref)              | 1.00 (ref)              |      |
| Former smoker                                                               | 1.28 (1.00,1.65)        | 1.11 (0.86,1.43)        |      | 1.25 (0.99,1.57)        | 1.11 (0.88,1.40)        |      |
| Quit smoking after diagnosis                                                | 1.30 (0.73,2.30)        | 0.58 (0.27,1.27)        |      | 1.18 (0.68,2.04)        | 0.81 (0.43,1.51)        |      |
| Remained current smoker                                                     | <b>1.55 (1.04,2.29)</b> | 1.12 (0.70,1.79)        |      | <b>1.59 (1.12,2.27)</b> | 1.12 (0.73,1.70)        |      |

Abbreviations: BMI, body mass index; CI, confidence interval; HR, hazard ratio; NHS, Nurses' Health Study; NHSII, Nurses' Health Study II. Never smoker is defined as being a never smoker at both pre- and post-diagnosis assessments; Former smoker is defined as being a former smoker at both assessments; Quit smoking after diagnosis is defined as being a current smoker before diagnosis and former smoker after diagnosis; Remained current smoker is defined as being a current smoker at both assessments.

Models adjusted for age and calendar year at diagnosis, tumor histologic subtype, stage and cohort.

Post-diagnosis models additionally adjusted for non-steroidal anti-inflammatory drug usage.

<sup>1</sup> Models adjusted for age and calendar year at diagnosis, tumor histologic subtype, stage, change of BMI and non-steroidal anti-inflammatory drug usage from pre- to post-diagnosis, and cohort.

<sup>2</sup> Due to the small sample size, participants who reported past smoking before diagnosis and current smoking after diagnosis were excluded (n=2).

<sup>3</sup> In the analyses of pre-diagnosis smoking and change of smoking, BMI refers to pre-diagnosis BMI; in post-diagnosis analyses, BMI refers to post-diagnosis BMI.

**Supplementary Table 6. Epithelial ovarian cancer-specific mortality and all-cause mortality stratified by post-diagnosis NSAID usage in the NHS and NHSII**

|                                                                             | Epithelial ovarian cancer-specific mortality |                                  |                     | All-cause mortality                  |                                  |                     |
|-----------------------------------------------------------------------------|----------------------------------------------|----------------------------------|---------------------|--------------------------------------|----------------------------------|---------------------|
|                                                                             | Non-current NSAID user<br>HR (95%CI)         | Current NSAID user<br>HR (95%CI) | p-<br>heterogeneity | Non-current NSAID user<br>HR (95%CI) | Current NSAID user<br>HR (95%CI) | p-<br>heterogeneity |
| <b>Post-diagnosis smoking</b>                                               |                                              |                                  |                     |                                      |                                  |                     |
| n, deaths/cases                                                             | 286/473                                      | 282/607                          | 0.20                | 338/473                              | 358/607                          | 0.40                |
| Never smoker                                                                | 1.00 (ref)                                   | 1.00 (ref)                       |                     | 1.00 (ref)                           | 1.00 (ref)                       |                     |
| Former smoker                                                               | <b>1.41 (1.09,1.82)</b>                      | 1.09 (0.84,1.40)                 |                     | <b>1.35 (1.07,1.70)</b>              | 1.11 (0.88,1.39)                 |                     |
| Current smoker                                                              | <b>1.64 (1.04,2.59)</b>                      | 1.28 (0.85,1.93)                 |                     | 1.40 (0.92,2.14)                     | 1.41 (0.99,2.01)                 |                     |
| <b>Post-diagnosis smoking rate</b>                                          |                                              |                                  |                     |                                      |                                  |                     |
| n, deaths/cases                                                             | 283/466                                      | 278/600                          | 0.06                | 332/466                              | 353/600                          | 0.20                |
| Never smoker                                                                | 1.00 (ref)                                   | 1.00 (ref)                       |                     | 1.00 (ref)                           | 1.00 (ref)                       |                     |
| Former smoker, <15 cigs/day                                                 | <b>1.37 (1.00,1.87)</b>                      | 1.12 (0.83,1.52)                 |                     | 1.28 (0.96,1.71)                     | 1.15 (0.88,1.51)                 |                     |
| Former smoker, ≥15 cigs/day                                                 | <b>1.47 (1.07,2.00)</b>                      | 1.02 (0.74,1.42)                 |                     | <b>1.40 (1.05,1.86)</b>              | 1.03 (0.77,1.38)                 |                     |
| Current smoker, <15 cigs/day                                                | 1.36 (0.70,2.64)                             | 0.87 (0.48,1.56)                 |                     | 1.01 (0.52,1.95)                     | 0.97 (0.58,1.62)                 |                     |
| Current smoker, ≥15 cigs/day                                                | <b>3.05 (1.69,5.51)</b>                      | <b>2.03 (1.18,3.49)</b>          |                     | <b>2.75 (1.59,4.75)</b>              | <b>2.15 (1.36,3.42)</b>          |                     |
| <b>Change in smoking from pre-diagnosis to post-diagnosis<sup>1,2</sup></b> |                                              |                                  |                     |                                      |                                  |                     |
| n, deaths/cases                                                             | 283/465                                      | 276/594                          | <b>&lt;0.01</b>     | 333/465                              | 350/594                          | <b>&lt;0.01</b>     |
| Never smoker                                                                | 1.00 (ref)                                   | 1.00 (ref)                       |                     | 1.00 (ref)                           | 1.00 (ref)                       |                     |
| Former smoker                                                               | <b>1.42 (1.10,1.82)</b>                      | 1.10 (0.84,1.42)                 |                     | <b>1.33 (1.05,1.68)</b>              | 1.12 (0.89,1.41)                 |                     |
| Quit smoking after diagnosis                                                | 0.77 (0.39,1.53)                             | 1.16 (0.58,2.32)                 |                     | 0.95 (0.54,1.66)                     | 1.16 (0.62,2.16)                 |                     |
| Remained current smoker                                                     | <b>1.82 (1.15,2.88)</b>                      | 1.18 (0.77,1.81)                 |                     | 1.54 (1.00,2.38)                     | 1.33 (0.92,1.92)                 |                     |

Abbreviations: BMI, body mass index; CI, confidence interval; HR, hazard ratio; NHS, Nurses' Health Study; NHSII, Nurses' Health Study II; NSAID, non-steroidal anti-inflammatory drug.

Non-current NSAID users included never and past users of NSAIDs.

Never smoker is defined as being a never smoker at both pre- and post-diagnosis assessments; Former smoker is defined as being a former smoker at both assessments; Quit smoking after diagnosis is defined as being a current smoker before diagnosis and former smoker after diagnosis; Remained current smoker is defined as being a current smoker at both assessments.

Models adjusted for age and calendar year at diagnosis, tumor histologic subtype, stage, post-diagnosis BMI (categorical), and cohort.

<sup>1</sup> Models adjusted for age and calendar year at diagnosis, tumor histologic subtype, stage, pre-diagnosis BMI (categorical), BMI change from pre- to post-diagnosis (categorical), and cohort.

<sup>2</sup> Due to the small sample size, participants who reported past smoking before diagnosis and current smoking after diagnosis were excluded (n=2).
